# Supplementary material
Source: publisher figshare collection journal article supplement (https://sage.figshare.com/ndownloader/files/15006344)
Supplement: Supplementary file 1 [file 15006344]

**Supplementary Table 1.** Cell surface molecules for circulating microvesicle identification and characterization.

| <b>mAb</b>       | <b>Alternative name</b>                       | <b>Expression</b>                      |
|------------------|-----------------------------------------------|----------------------------------------|
| <b>Annexin V</b> | PS-binding protein                            | Widely expressed                       |
| <b>CD142</b>     | Tissue Factor                                 | Widely expressed                       |
| <b>CD61</b>      | $\beta_3$ -integrin                           | Platelets                              |
| <b>CD31</b>      | Platelet endothelial cell adhesion molecule   | Platelets, Endothelial cells           |
| <b>CD62P</b>     | P-Selectin                                    | Activated Platelets                    |
| <b>CD42b</b>     | receptor for von Willebrand factor            | Activated Platelets                    |
| <b>CD146</b>     | Melanoma Cell Adhesion Molecule               | Endothelial Cells                      |
| <b>CD62E</b>     | E-Selectin                                    | Endothelial Cells                      |
| <b>CD34</b>      | Mucosialin                                    | Progenitor and Stem Cells              |
| <b>CD309</b>     | vascular endothelial growth factor receptor-2 | Endothelial Cells                      |
| <b>CD45</b>      | Leukocyte Common Antigen                      | Leukocytes                             |
| <b>CD11b</b>     | Lymphocyte function-associated antigen 1      | Leukocytes                             |
| <b>CD62L</b>     | L-Selectin                                    | Leukocytes                             |
| <b>CD14</b>      | LPS-receptor                                  | Macrophages, monocytes                 |
| <b>CD15</b>      | Lewis X                                       | Neutrophils, eosinophils and monocytes |

mAb indicates monoclonal antibody; PS, phosphatidylserine; and LPS, lipopolysaccharide.
